# Supplementary material for: Tuning intrinsic disorder predictors for virus proteins
Source: PubMed Central journal article supplement (PMC7882063; doi:10.1093/ve/veaa106), 2021-01-25
Supplement: veaa106_supplementary_data.pdf [file veaa106_supplementary_data.pdf]

## 1 Supplementary Tables

Table S1: Summary of viral protein data

| Family                       | Organism                              | Protein                                       | Disprot ID | Length |
|------------------------------|---------------------------------------|-----------------------------------------------|------------|--------|
| Alphafusellovirus            | Sulfolobus spindle-shape virus 1      | Protein F-112                                 | DP00847    | 112    |
| Alphatectivirus              | Enterobacteria phage PRD1             | Protein P16                                   | DP01012    | 117    |
| Betapolyomavirus             | JC polyomavirus                       | Agnoprotein                                   | DP01186    | 71     |
|                              | Simian virus 40                       | Large T antigen                               | DP01618    | 708    |
| Chordopoxvirinae             | Molluscum contagiosum virus subtype 1 | Major capsid protein VP1                      | DP00182    | 362    |
|                              |                                       | Viral CASP8 and FADD-like apoptosis regulator | DP02042    | 241    |
|                              | Myxoma virus                          | M156R                                         | DP00849    | 102    |
|                              |                                       | Probable host range protein 2-3               | DP01983    | 203    |
| Vaccinia virus               | Protein F1                            | DP01539                                       | 222        |        |
|                              | Protein K7                            | DP02194                                       | 149        |        |
|                              | Small delta antigen                   | DP00965                                       | 195        |        |
| Deltavirus                   | Hepatitis delta virus genotype I      |                                               |            |        |
| Firstpapillomavirinae        | Human papillomavirus type 16          | Protein E6                                    | DP01615    | 158    |
|                              |                                       | Protein E7                                    | DP00024    | 98     |
|                              |                                       | Regulatory protein E2                         | DP01428    | 365    |
|                              | Human papillomavirus type 45          | Protein E7                                    | DP01780    | 106    |
|                              |                                       | Protein E7                                    | DP00947    | 106    |
| Human papillomavirus type 51 | Protein E6                            | DP02256                                       | 151        |        |
| Flaviviridae                 | Bovine viral diarrhea virus           | Genome polyprotein                            | DP00675    | 3988   |
|                              | Dengue virus type 1                   | Genome polyprotein                            | DP01929    | 3392   |
|                              | Dengue virus type 2                   | Genome polyprotein                            | DP01930    | 3391   |
|                              |                                       |                                               | DP01245    | 3388   |
|                              |                                       |                                               | DP00876    | 3391   |
|                              | Dengue virus type 3                   | Genome polyprotein                            | DP02204    | 3390   |
|                              | Dengue virus type 4                   | Genome polyprotein                            | DP01931    | 3387   |
|                              | Hepatitis C virus genotype 1a         | Genome polyprotein                            | DP00588    | 3011   |
|                              | Hepatitis C virus genotype 1b         | Genome polyprotein                            | DP01142    | 3010   |

Table S1: Summary of viral protein data

| Family                          | Organism                                | Protein                                                     | Disprot ID                            | Length  |      |
|---------------------------------|-----------------------------------------|-------------------------------------------------------------|---------------------------------------|---------|------|
| Flaviviridae                    | Hepatitis C virus genotype 1b           | Genome polyprotein                                          | DP00615                               | 3010    |      |
|                                 | Hepatitis C virus genotype 2a           | Genome polyprotein                                          | DP01031                               | 3033    |      |
|                                 | Hepatitis GB virus B                    | Genome polyprotein                                          | DP00674                               | 2864    |      |
|                                 | Kunjin virus                            | Genome polyprotein                                          | DP02051                               | 3433    |      |
|                                 | Murray valley encephalitis virus        | Genome polyprotein                                          | DP02212                               | 3434    |      |
|                                 | Herpesviridae                           | West Nile virus                                             | Genome polyprotein                    | DP02203 | 3433 |
|                                 |                                         | Zika virus                                                  | Genome polyprotein                    | DP01256 | 3419 |
|                                 |                                         | Epstein-Barr virus                                          | Latent membrane protein 2A            | DP01060 | 118  |
|                                 |                                         | Human herpesvirus 1                                         | Envelope glycoprotein B               | DP02128 | 904  |
|                                 |                                         |                                                             | Major viral transcription factor ICP4 | DP01305 | 1298 |
| TAP transporter inhibitor ICP47 |                                         |                                                             | DP02208                               | 88      |      |
| Tegument protein VP16           |                                         |                                                             | DP02291                               | 490     |      |
| Human herpesvirus 2             |                                         |                                                             | DP01642                               | 490     |      |
|                                 |                                         | Thymidine kinase                                            | DP00419                               | 376     |      |
|                                 |                                         | Tegument protein VP16                                       | DP00087                               | 490     |      |
|                                 | Human herpesvirus 8                     | Kaposi's sarcoma-associated herpes-like virus ORF73 homolog | DP02334                               | 1162    |      |
| LANA                            |                                         | DP01621                                                     | 1117                                  |         |      |
| Human herpesvirus 8 type P      | Viral macrophage inflammatory protein 2 | DP00685                                                     | 94                                    |         |      |
| Inovirus                        | Enterobacteria phage fd                 | Attachment protein G3P                                      | DP00034                               | 424     |      |
|                                 | Mastadenovirus                          | Human adenovirus A serotype 12                              | Early E1A protein                     | DP01151 | 266  |
| Human adenovirus C serotype 2   |                                         | Early E1A protein                                           | DP01928                               | 289     |      |
| Human adenovirus C serotype 5   |                                         | DNA-binding protein                                         | DP00003                               | 529     |      |
|                                 |                                         | Early E1A protein                                           | DP01150                               | 289     |      |
| Mimivirus                       | Acanthamoeba polyphaga mimivirus        | Pre-protein VI                                              | DP00808                               | 250     |      |
|                                 |                                         | Probable uracil-DNA glycosylase                             | DP01481                               | 370     |      |

Table S1: Summary of viral protein data

| Family                             | Organism                            | Protein                                     | Disprot ID    | Length  |
|------------------------------------|-------------------------------------|---------------------------------------------|---------------|---------|
| Mimivirus                          | Acanthamoeba polyphaga mimivirus    | Tyrosine-tRNA ligase                        | DP00726       | 346     |
| Myoviridae                         | Enterobacteria phage T4             | Baseplate central spike complex protein gp5 | DP00284       | 575     |
|                                    |                                     | Deoxycytidylate deaminase                   | DP00583       | 193     |
|                                    |                                     | Fibritin                                    | DP01616       | 487     |
|                                    |                                     | RNA polymerase-associated protein Gp33      | DP00898       | 112     |
|                                    |                                     | Escherichia phage P1                        | Antitoxin phd | DP00288 |
| Myoviridae                         | Escherichia phage P2                | Recombination enhancement function protein  | DP00932       | 186     |
|                                    |                                     | Integrase                                   | DP00850       | 337     |
| Negarnaviricota                    | Hendra virus                        | Nucleoprotein                               | DP00698       | 532     |
|                                    |                                     | Phosphoprotein                              | DP00700       | 707     |
| Negarnaviricota                    | Human respiratory syncytial virus A | Phosphoprotein                              | DP00447       | 241     |
|                                    |                                     | Phosphoprotein                              | DP00895       | 241     |
|                                    |                                     | Hemagglutinin                               | DP00566       | 566     |
|                                    | Influenza A virus                   | Matrix protein 2                            | DP01016       | 96      |
|                                    |                                     | Nuclear export protein                      | DP00871       | 121     |
|                                    |                                     | Nucleoprotein                               | DP01405       | 560     |
|                                    | Influenza B virus                   | Nucleoprotein                               | DP00820       | 99      |
|                                    | Lassa virus                         | RING finger protein Z                       | DP00160       | 523     |
|                                    | Measles virus                       | Nucleoprotein                               | DP00640       | 525     |
|                                    |                                     | Phosphoprotein                              | DP00133       | 507     |
|                                    |                                     | Glycoprotein G                              | DP00686       | 602     |
|                                    | Nipah virus                         | Nucleoprotein                               | DP00697       | 532     |
|                                    |                                     | Phosphoprotein                              | DP00699       | 709     |
|                                    |                                     | Phosphoprotein                              | DP01759       | 297     |
|                                    | Rabies virus                        | Phosphoprotein                              | DP00629       | 524     |
| Sendai virus                       | Nucleoprotein                       | DP00939                                     | 568           |         |
|                                    | Phosphoprotein                      | DP01395                                     | 265           |         |
|                                    | Phosphoprotein                      | DP01394                                     | 265           |         |
| Vesicular stomatitis Indiana virus | Phosphoprotein                      | DP01393                                     | 265           |         |
|                                    | Phosphoprotein                      | DP01391                                     | 265           |         |
|                                    | Phosphoprotein                      | DP00627                                     | 288           |         |
| Zaire ebolavirus                   | Hexameric zinc-finger protein VP30  | Polymerase cofactor VP35                    | DP00998       | 340     |

Table S1: Summary of viral protein data

| Family            | Organism                         | Protein                             | Disprot ID | Length |
|-------------------|----------------------------------|-------------------------------------|------------|--------|
| Nidovirales       | Human SARS coron-avirus          | Nucleoprotein                       | DP00948    | 422    |
| Orthohepadnavirus | Hepatitis B virus                | Large envelope protein              | DP01806    | 445    |
| Parvovirinae      | Adeno-associated virus           | Capsid protein VP1                  | DP01984    | 733    |
| Picornavirales    | Enterovirus D68                  | VP4                                 | DP00986    | 69     |
|                   | Foot-and-mouth disease virus     | Genome polyprotein                  | DP00573    | 2332   |
|                   | Mengo encephalomyocarditis virus | Genome polyprotein                  | DP01129    | 2293   |
| Podoviridae       | Bacillus phage phi29             | Capsid assembly scaffolding protein | DP02261    | 98     |
|                   | Salmonella phage P22             | Transcriptional repressor arc       | DP01512    | 53     |
| Potyviridae       | Potato virus Y                   | Polyprotein                         | DP01039    | 594    |
| Reoviridae        | Reptilian orthoreovirus          | Membrane fusion protein p14         | DP01043    | 125    |
| Retroviridae      | Equine infectious anemia virus   | Protein Tat                         | DP00764    | 78     |
|                   | HIV-1                            | Protein Nef                         | DP00919    | 208    |
|                   | HIV-1                            | Protein Tat                         | DP01295    | 72     |
|                   | HIV-1                            | Protein Tat                         | DP01087    | 101    |
|                   | HIV-1 subtype B                  | Envelope glycoprotein gp160         | DP00976    | 856    |
|                   |                                  | Envelope glycoprotein gp160         | DP00978    | 843    |
|                   |                                  | Gag-Pol polyprotein                 | DP00410    | 1435   |
|                   |                                  | Gag polyprotein                     | DP00101    | 500    |
|                   |                                  | Gag polyprotein                     | DP00148    | 512    |
|                   |                                  | Protein Nef                         | DP01843    | 206    |
|                   |                                  | Protein Nef                         | DP00048    | 206    |
|                   |                                  | Protein Nef                         | DP00189    | 206    |
|                   |                                  | Protein Rev                         | DP00424    | 116    |
|                   |                                  | Protein Tat                         | DP00929    | 86     |
|                   |                                  | Protein Vif                         | DP00875    | 192    |
|                   | HIV-1 subtype C                  | Protein Tat                         | DP01003    | 101    |
|                   | HIV-1 subtype D                  | Protein Tat                         | DP00842    | 86     |
|                   | Mason-Pfizer monkey virus        | Gag polyprotein                     | DP01625    | 657    |
|                   | Moloney murine leukemia virus    | Gag-Pol polyprotein                 | DP00651    | 1738   |

Table S1: Summary of viral protein data

| Family        | Organism                      | Protein                         | Disprot ID | Length |
|---------------|-------------------------------|---------------------------------|------------|--------|
| Siphoviridae  | Bacillus phage SPP1           | 39 protein                      | DP00750    | 126    |
|               | Escherichia phage HK022       | Excisionase                     | DP01013    | 72     |
|               | Escherichia phage lambda      | Antitermination protein N       | DP00005    | 107    |
|               |                               | DNA-packaging protein FI        | DP01336    | 132    |
|               |                               | Head-tail connector protein FII | DP01762    | 117    |
|               |                               | Regulatory protein cro          | DP00741    | 66     |
| Solemoviridae | Southern cowpea mosaic virus  | Capsid protein                  | DP00064    | 279    |
| Togaviridae   | Chikungunya virus             | Nonstructural polyprotein       | DP01469    | 2474   |
|               |                               |                                 | DP01468    | 2474   |
|               |                               |                                 | DP01466    | 2474   |
|               |                               |                                 | DP01188    | 2474   |
|               | Semliki forest virus          | Structural polyprotein          | DP00999    | 1253   |
| Tombusviridae | Sindbis virus subtype Ockelbo | Structural polyprotein          | DP00066    | 1245   |
|               | Carnation mottle virus        | Capsid protein                  | DP02071    | 348    |
| Tymovirales   | Pepino mosaic virus           | Coat protein                    | DP01059    | 237    |

Table S2: Summary of non-viral protein data

| Family   | Organism     | Protein                                             | Disprot ID | Length |
|----------|--------------|-----------------------------------------------------|------------|--------|
| Chordata | Homo sapiens | 60S acidic ribosomal protein P2                     | DP00793    | 115    |
|          |              | 60S ribosomal protein L4                            | DP01654    | 427    |
|          |              | Amyloid-beta precursor protein                      | DP01280    | 770    |
|          |              | Anaphase-promoting complex subunit 15               | DP01454    | 121    |
|          |              | Androgen receptor                                   | DP00492    | 920    |
|          |              | Antigen peptide transporter 2                       | DP02210    | 686    |
|          |              | Apoptosis-stimulating of p53 protein 2              | DP01164    | 1128   |
|          |              | ATM interactor                                      | DP01288    | 823    |
|          |              | ATP-dependent RNA helicase DDX19B                   | DP01560    | 479    |
|          |              | Axin-1                                              | DP00959    | 862    |
|          |              | Beta-adducin                                        | DP00241    | 726    |
|          |              | Brain acid soluble protein 1                        | DP00930    | 227    |
|          |              | Breast cancer type 2 susceptibility protein         | DP01869    | 3418   |
|          |              | Calmodulin regulator protein PCP4                   | DP00592    | 62     |
|          |              | cAMP-dependent protein kinase inhibitor alpha       | DP00934    | 76     |
|          |              | C-C motif chemokine 26                              | DP00696    | 94     |
|          |              | Cellular tumor antigen p53                          | DP00086    | 393    |
|          |              | Cyclin-T1                                           | DP01462    | 726    |
|          |              | Cysteine protease ATG4B                             | DP01326    | 393    |
|          |              | Cystic fibrosis transmembrane conductance regulator | DP00012    | 1480   |
|          |              | Cytoplasmic protein NCK1                            | DP01114    | 377    |
|          |              | DnaJ homolog subfamily C member 24                  | DP00865    | 149    |
|          |              | DNA repair protein XRCC4                            | DP00152    | 336    |
|          |              | E3 ubiquitin-protein ligase PPP1R11                 | DP00219    | 126    |

Table S2: Summary of non-viral protein data

| Family   | Organism     | Protein                                                                          | Disprot ID | Length |
|----------|--------------|----------------------------------------------------------------------------------|------------|--------|
| Chordata | Homo sapiens | E3 ubiquitin-protein ligase XIAP                                                 | DP01773    | 497    |
|          |              | Epidermal growth factor receptor                                                 | DP00309    | 1210   |
|          |              | ETS domain-containing protein Elk-4                                              | DP01329    | 431    |
|          |              | Eukaryotic initiation factor 4A-III                                              | DP02069    | 411    |
|          |              | Eukaryotic translation initiation factor 1A, X-chromosomal                       | DP00903    | 144    |
|          |              | F-box only protein 4                                                             | DP01884    | 387    |
|          |              | Filamin-binding LIM protein 1                                                    | DP01310    | 373    |
|          |              | Geminin                                                                          | DP00901    | 209    |
|          |              | Glycosylphosphatidylinositol anchored high density lipoprotein-binding protein 1 | DP01327    | 184    |
|          |              | Heterogeneous nuclear ribonucleoprotein F                                        | DP01736    | 415    |
|          |              | Heterogeneous nuclear ribonucleoproteins A2/B1                                   | DP01109    | 353    |
|          |              | Homeobox protein Nkx-3.1                                                         | DP00683    | 234    |
|          |              | Hypoxia-inducible factor 1-alpha                                                 | DP00262    | 826    |
|          |              | Immunoglobulin alpha Fc receptor                                                 | DP00311    | 287    |
|          |              | Integrin beta-2                                                                  | DP01848    | 769    |
|          |              | Isoform 11 of E3 ubiquitin-protein ligase Mdm2                                   | DP01133    | 497    |
|          |              | Isoform 2 of Protein max                                                         | DP01097    | 151    |
|          |              | Kinetochore protein NDC80 homolog                                                | DP01576    | 642    |
|          |              | Kinetochore scaffold 1                                                           | DP01269    | 2342   |
|          |              | Mast/stem cell growth factor receptor Kit                                        | DP02247    | 976    |
|          |              | M-phase inducer phosphatase 3                                                    | DP02126    | 473    |

Table S2: Summary of non-viral protein data

| Family   | Organism     | Protein                                          | Disprot ID | Length |
|----------|--------------|--------------------------------------------------|------------|--------|
| Chordata | Homo sapiens | Natriuretic peptides B                           | DP00551    | 134    |
|          |              | Neurogenic locus notch homolog protein 1         | DP01104    | 2555   |
|          |              | Nuclear inhibitor of protein phosphatase 1       | DP00937    | 351    |
|          |              | Nuclear pore complex protein Nup133              | DP02164    | 1156   |
|          |              | Nuclear pore complex protein Nup153              | DP01799    | 1475   |
|          |              | Nuclear receptor coactivator 2                   | DP01880    | 1464   |
|          |              | Nuclear receptor coactivator 3                   | DP00343    | 1424   |
|          |              | Nucleophosmin                                    | DP01474    | 294    |
|          |              | P antigen family member 5                        | DP01473    | 130    |
|          |              | Peroxisome proliferator-activated receptor gamma | DP00718    | 505    |
|          |              | Polyglutamine-binding protein 1                  | DP01308    | 265    |
|          |              | Protein jagged-1                                 | DP00418    | 1218   |
|          |              | Protein max                                      | DP00084    | 160    |
|          |              | Protein regulator of cytokinesis 1               | DP02316    | 620    |
|          |              | Protein SMG7                                     | DP01844    | 1137   |
|          |              | Prothymosin alpha                                | DP01677    | 111    |
|          |              | Proto-oncogene c-Fos                             | DP00078    | 380    |
|          |              | Ras-related protein Rap-2a                       | DP00167    | 183    |
|          |              | Replication protein A 32 kDa subunit             | DP01361    | 270    |
|          |              | Serine/threonine-protein kinase PAK 4            | DP01184    | 591    |
|          |              | Signal recognition particle 19 kDa protein       | DP00570    | 144    |
|          |              | SOSS complex subunit C                           | DP01943    | 104    |
|          |              | Stonin-2                                         | DP01368    | 905    |
|          |              | T-cell surface glycoprotein CD3 gamma chain      | DP00508    | 182    |
|          |              | Thymidylate synthase                             | DP00073    | 313    |
|          |              | TP53-regulated inhibitor of apoptosis 1          | DP01835    | 76     |



Table S2: Summary of non-viral protein data

| Family   | Organism                                             | Protein                                                   | Disprot ID                                         | Length  |     |
|----------|------------------------------------------------------|-----------------------------------------------------------|----------------------------------------------------|---------|-----|
| Chordata | Homo sapiens                                         | Transcription elongation regulator 1                      | DP01893                                            | 1098    |     |
|          |                                                      | Transcription initiation factor TFIID subunit 6           | DP01262                                            | 677     |     |
|          |                                                      | Tyrosine-protein kinase Lck                               | DP01580                                            | 509     |     |
|          |                                                      | Ubiquitin carboxyl-terminal hydrolase 7                   | DP00941                                            | 1102    |     |
|          | Mus musculus                                         | Amelogenin, X isoform                                     | DP01477                                            | 210     |     |
|          |                                                      | BH3-interacting domain death agonist                      | DP01661                                            | 195     |     |
|          |                                                      | Dehydrodolichyl diphosphate synthase complex subunit Nus1 | DP01304                                            | 297     |     |
|          |                                                      | Dystroglycan                                              | DP00491                                            | 893     |     |
|          |                                                      | Fermitin family homolog 1                                 | DP00655                                            | 677     |     |
|          |                                                      | Mediator of RNA polymerase II transcription subunit 1     | DP02151                                            | 1575    |     |
|          |                                                      | Phorbol-12-myristate-13-acetate-induced protein 1         | DP01281                                            | 103     |     |
|          |                                                      | Protein BEX1                                              | DP01183                                            | 128     |     |
|          |                                                      | Protein kinase C alpha type                               | DP01105                                            | 672     |     |
|          |                                                      | Transcription regulator protein BACH2                     | DP01009                                            | 839     |     |
|          |                                                      | Tumor suppressor ARF                                      | DP00335                                            | 169     |     |
|          |                                                      | Rattus norvegicus                                         | Calcium/calmodulin-dependent protein kinase type 1 | DP01958 | 374 |
|          |                                                      |                                                           | Calpain-2 catalytic subunit                        | DP01996 | 700 |
|          |                                                      |                                                           | Calpastatin                                        | DP01994 | 713 |
|          |                                                      |                                                           | Cyclic AMP-responsive element-binding protein 1    | DP00080 | 341 |
|          |                                                      |                                                           | Neuroendocrine protein 7B2                         | DP01557 | 210 |
|          | Olfactory marker protein                             |                                                           | DP00279                                            | 163     |     |
|          | Rab proteins geranylgeranyltransferase component A 1 |                                                           | DP00458                                            | 650     |     |

Table S2: Summary of non-viral protein data

| Family                           | Organism                 | Protein                                                                    | Disprot ID | Length |
|----------------------------------|--------------------------|----------------------------------------------------------------------------|------------|--------|
| Chordata                         | Rattus norvegicus        | Seminal vesicle secretory protein 4                                        | DP00527    | 112    |
|                                  |                          | Synaptosomal-associated protein 25                                         | DP00068    | 206    |
|                                  |                          | Vesicle-associated membrane protein 2                                      | DP00622    | 116    |
| Dikarya                          | Millerozyma farinosa     | Salt-mediated killer protoxin 1                                            | DP00180    | 222    |
|                                  | Saccharomyces cerevisiae | Acetyl-CoA carboxylase                                                     | DP00557    | 2233   |
|                                  |                          | Autophagy-related protein 13                                               | DP01732    | 738    |
|                                  |                          | Cold sensitive U2 snRNA suppressor 1                                       | DP01978    | 436    |
|                                  |                          | DNA-directed RNA polymerases I, II, and III subunit RPABC2                 | DP00771    | 155    |
|                                  |                          | DNA topoisomerase 2                                                        | DP00076    | 1428   |
|                                  |                          | Dolichyl-diphosphooligosaccharide-protein glycosyltransferase subunit STT3 | DP01195    | 718    |
|                                  |                          | Eukaryotic initiation factor 4F subunit p150                               | DP00082    | 952    |
|                                  |                          | H/ACA ribonucleoprotein complex subunit CBF5                               | DP02055    | 483    |
|                                  |                          | Histone H2A.Z-specific chaperone CHZ1                                      | DP01135    | 153    |
|                                  |                          | Mitochondrial distribution and morphology protein 35                       | DP02325    | 86     |
|                                  |                          | Pre-mRNA-splicing factor 18                                                | DP02073    | 251    |
|                                  |                          | Protein SAN1                                                               | DP01136    | 610    |
|                                  |                          | Protein STE50                                                              | DP01515    | 346    |
|                                  |                          | Regulatory protein ADR1                                                    | DP00077    | 1323   |
| Ribosome biogenesis protein ERB1 | DP00900                  | 807                                                                        |            |        |
| Ribosome biogenesis protein NSA1 | DP02195                  | 463                                                                        |            |        |

Table S2: Summary of non-viral protein data

| Family       | Organism                 | Protein                                                 | Disprot ID | Length |
|--------------|--------------------------|---------------------------------------------------------|------------|--------|
| Dikarya      | Saccharomyces cerevisiae | Securin                                                 | DP00256    | 373    |
|              |                          | Suppressor protein STM1                                 | DP00994    | 273    |
|              |                          | U6 snRNA-associated Sm-like protein LSm7                | DP01261    | 115    |
|              |                          | Ubiquitin-conjugating enzyme E2 1                       | DP02193    | 215    |
|              |                          | Ubiquitin-like modifier-activating enzyme ATG7          | DP02249    | 630    |
|              |                          | UV excision repair protein RAD23                        | DP01629    | 398    |
|              |                          | Vacuolar-sorting protein SNF8                           | DP01604    | 233    |
|              |                          | YTH domain-containing protein mmi1                      | DP01975    | 488    |
| Ecdysozoa    | Caenorhabditis elegans   | ATP-dependent RNA helicase laf-1                        | DP01113    | 708    |
|              | Drosophila melanogaster  | Chromatin accessibility complex 16kD protein, isoform A | DP00811    | 140    |
|              |                          | FACT complex subunit Ssrp1                              | DP00720    | 723    |
|              |                          | Transcription initiation factor TFIID subunit 1         | DP00081    | 2129   |
| Streptophyta | Arabidopsis thaliana     | Auxin-responsive protein IAA7                           | DP01121    | 243    |
|              |                          | Calvin cycle protein CP12-2, chloroplastic              | DP00534    | 131    |
|              |                          | Dehydrin COR47                                          | DP00657    | 265    |

Table S3: Optimized thresholds and accuracy of intrinsic disorder prediction in viral proteins for each predictor analysed. MCC = Matthews correlation coefficient; AUC = area under the receiver operator characteristic curve.

| Predictor       | MCC  | AUC  | Specificity | Sensitivity | Threshold |
|-----------------|------|------|-------------|-------------|-----------|
| ESpritz.Disprot | 0.46 | 0.85 | 0.64        | 0.90        | 0.29      |
| CSpritz.Long    | 0.45 | 0.85 | 0.57        | 0.92        | 0.34      |
| SPOT.Disorder2  | 0.42 | 0.84 | 0.65        | 0.88        | 0.13      |
| CSpritz.Short   | 0.38 | 0.82 | 0.67        | 0.85        | 0.11      |
| PONDRFIT        | 0.37 | 0.80 | 0.57        | 0.88        | 0.50      |
| PONDR.VL3       | 0.36 | 0.78 | 0.56        | 0.88        | 0.54      |
| ESpritz.Xray    | 0.35 | 0.80 | 0.58        | 0.87        | 0.06      |
| Disprot.vslb    | 0.35 | 0.78 | 0.54        | 0.88        | 0.65      |
| PONDR.VSL2      | 0.35 | 0.78 | 0.54        | 0.88        | 0.65      |
| IUPRED2.short   | 0.34 | 0.79 | 0.57        | 0.87        | 0.47      |
| Disprot.vl3     | 0.34 | 0.79 | 0.53        | 0.88        | 0.68      |
| Disprot.vl3h    | 0.34 | 0.78 | 0.55        | 0.87        | 0.63      |
| IUPRED2.long    | 0.33 | 0.78 | 0.54        | 0.87        | 0.49      |
| Disprot.vl2     | 0.29 | 0.76 | 0.53        | 0.85        | 0.57      |
| ESpritz.NMR     | 0.27 | 0.74 | 0.52        | 0.84        | 0.36      |
| Disprot.vl2.S   | 0.24 | 0.73 | 0.53        | 0.81        | 0.54      |
| PONDR.VLXT      | 0.22 | 0.71 | 0.50        | 0.80        | 0.62      |
| Disprot.vl2.C   | 0.20 | 0.70 | 0.57        | 0.73        | 0.52      |
| PONDR.XL1       | 0.15 | 0.59 | 0.38        | 0.82        | 0.69      |
| Disprot.vl2.V   | 0.14 | 0.62 | 0.29        | 0.87        | 0.52      |
| PONDR.CAN       | 0.11 | 0.59 | 0.25        | 0.88        | 0.62      |

Table S4: Optimized thresholds and accuracy of intrinsic disorder prediction in non-viral proteins for each predictor analysed. MCC = Matthews correlation coefficient; AUC = area under the receiver operator characteristic curve.

| Predictor       | MCC  | AUC  | Specificity | Sensitivity | Threshold |
|-----------------|------|------|-------------|-------------|-----------|
| ESpritz.Disprot | 0.36 | 0.79 | 0.65        | 0.78        | 0.38      |
| ESpritz.Xray    | 0.35 | 0.77 | 0.73        | 0.70        | 0.06      |
| SPOT.Disorder2  | 0.34 | 0.77 | 0.70        | 0.73        | 0.24      |
| IUPRED2.short   | 0.33 | 0.76 | 0.72        | 0.69        | 0.42      |
| IUPRED2.long    | 0.32 | 0.76 | 0.72        | 0.69        | 0.47      |
| PONDRFIT        | 0.32 | 0.75 | 0.74        | 0.67        | 0.46      |
| PONDR.VSL2      | 0.30 | 0.74 | 0.76        | 0.63        | 0.62      |
| PONDR.VL3       | 0.28 | 0.74 | 0.78        | 0.59        | 0.51      |
| ESpritz.NMR     | 0.28 | 0.73 | 0.65        | 0.70        | 0.39      |
| CSpritz.Long    | 0.26 | 0.71 | 0.83        | 0.51        | 0.21      |
| PONDR.VLXT      | 0.23 | 0.69 | 0.70        | 0.60        | 0.41      |
| PONDR.XL1       | 0.18 | 0.64 | 0.56        | 0.67        | 0.62      |
| PONDR.CAN       | 0.13 | 0.60 | 0.51        | 0.65        | 0.34      |
